# Supplementary material for: Defining the spatial distribution of extracellular adenosine revealed a myeloid-dependent immunosuppressive microenvironment in pancreatic ductal adenocarcinoma
Source: PubMed Central journal article supplement (PMC10414095; doi:10.1136/jitc-2022-006457), 2023-08-08
Supplement: jitc-2022-006457supp001.pdf [file jitc-2022-006457supp001.pdf]

**Supplementary figure 1**

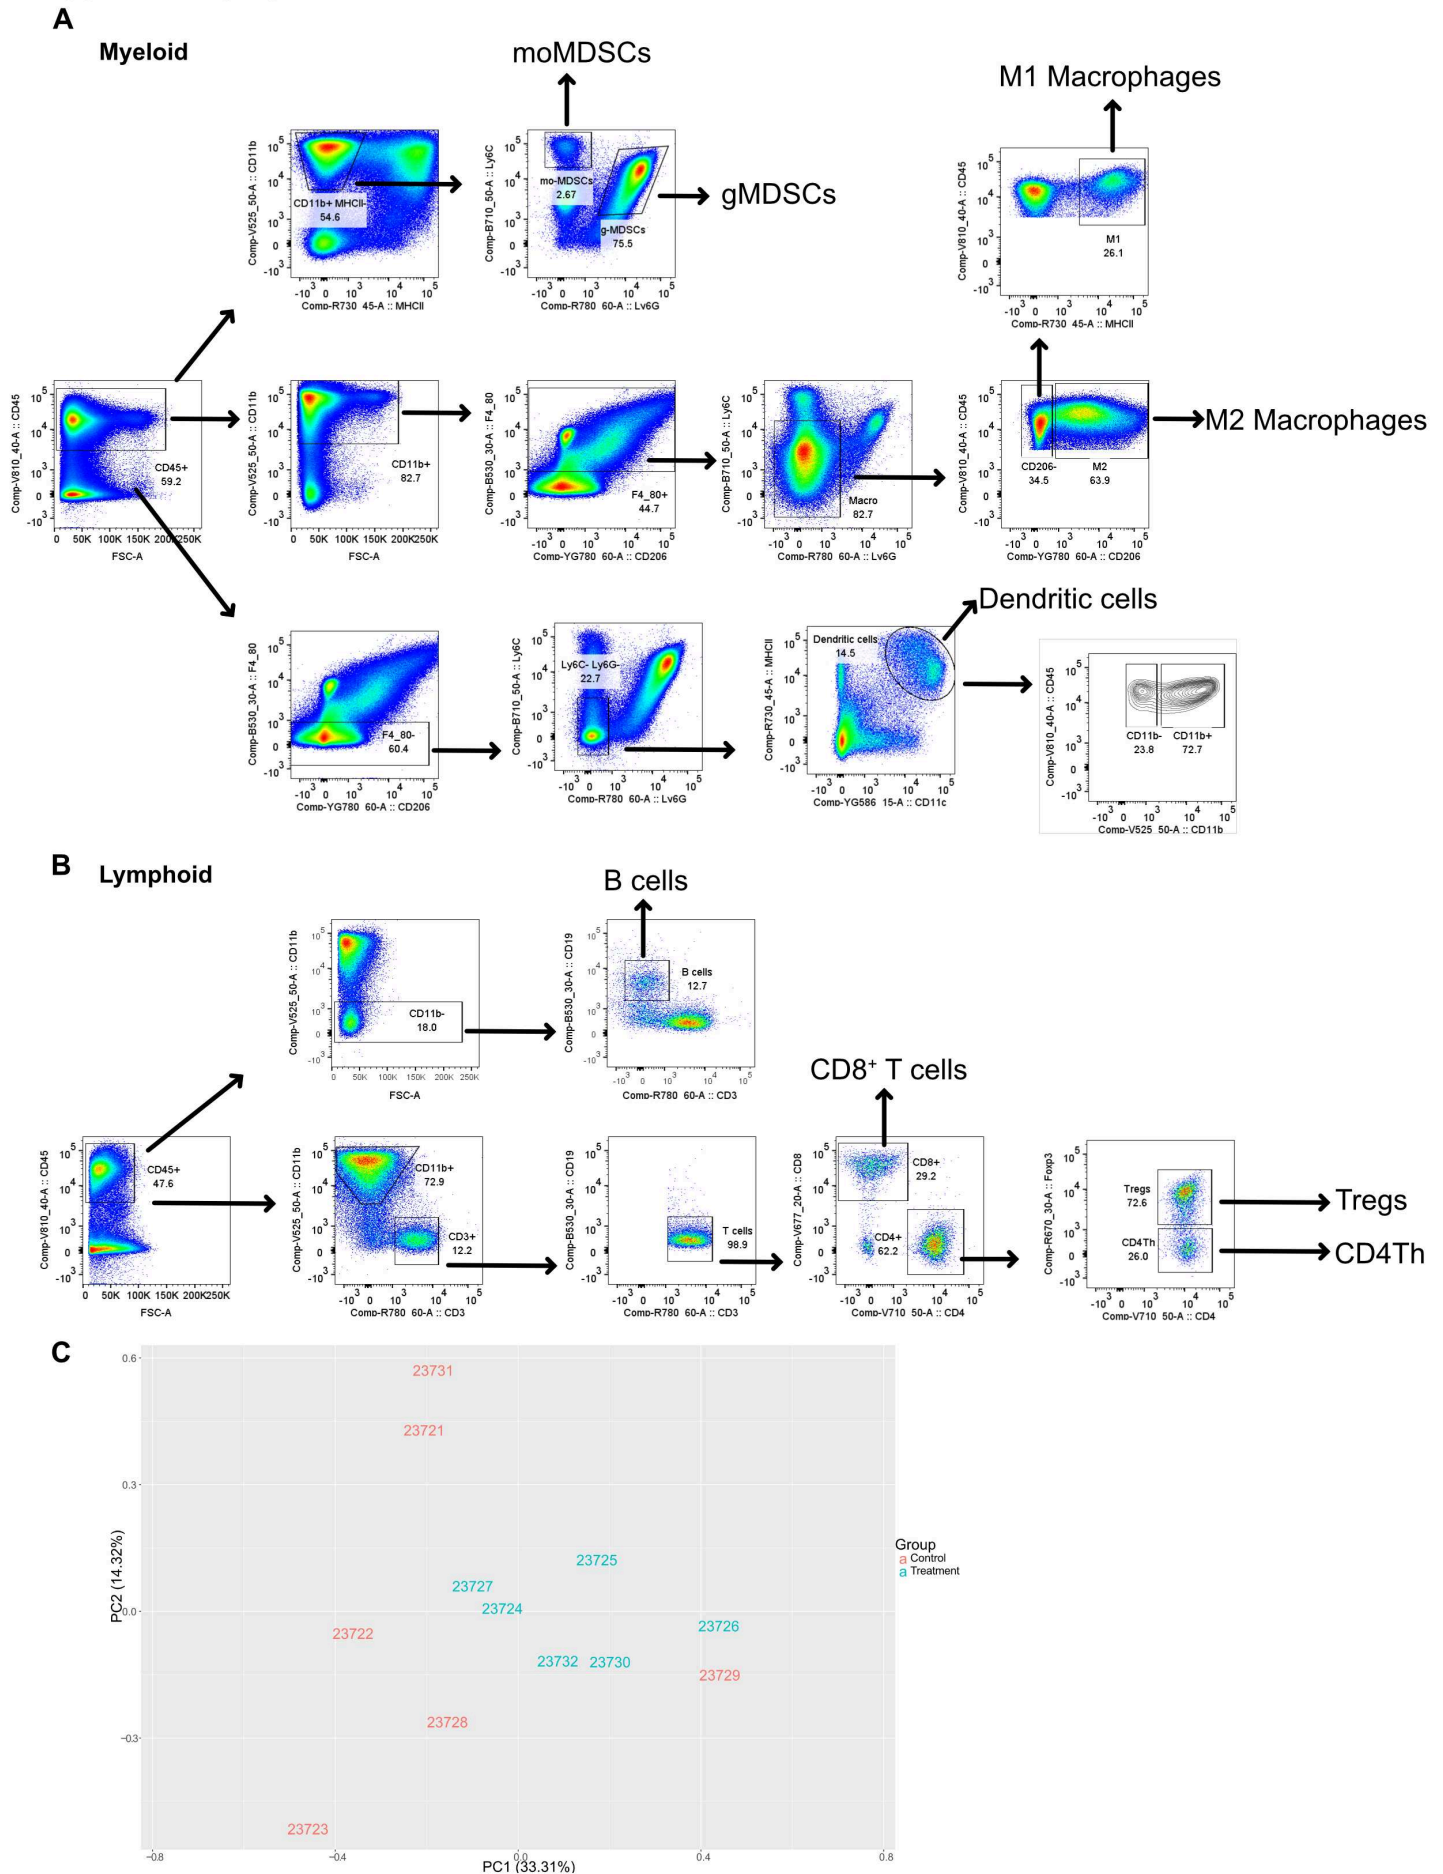

**Supplementary figure 1. Gating strategy and RNaseq PCA.** Flow cytometry dot plots showing gating strategy for myeloid (A) and lymphoid (B) immune populations. (C) PCA analysis of RNaseq related to mice with 6419c5 allografts treated with vehicle+isotype (n=6) or  $\alpha$ CD73+AZD4635 (n=6) for 14 days.

**Supplementary figure 2**

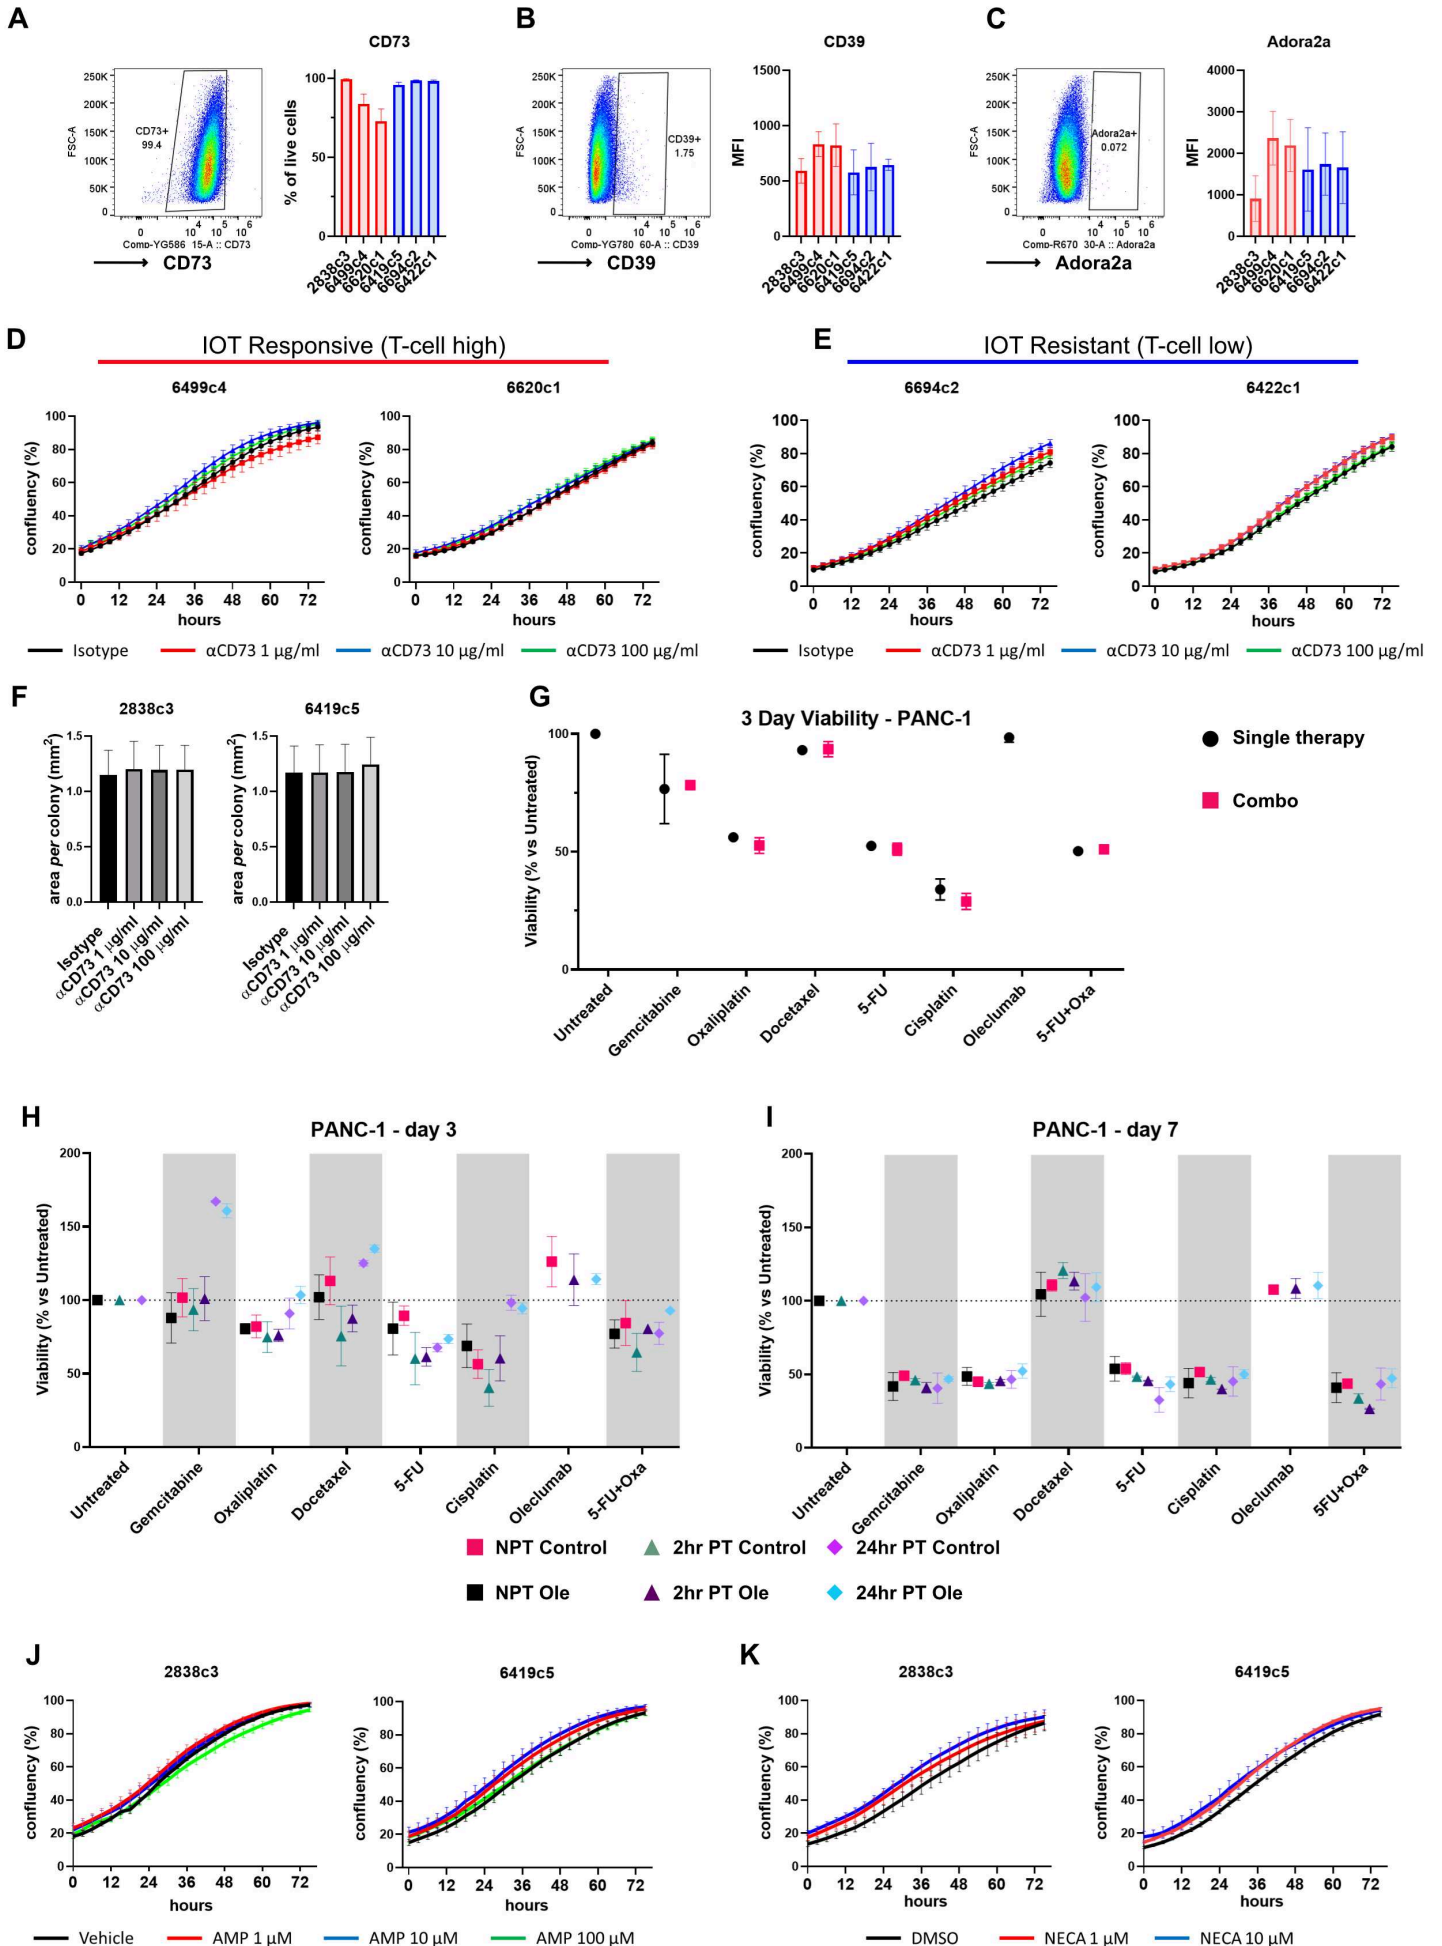

**Supplementary figure 2. Expression of the adenosine pathway on KPC-derived cell lines and response to anti-CD73 antibody.** (A-C) Representative dot plots for CD73 (A), CD39 (B) and Adora2a (C) expression on KPC-derived cell lines and associated bar graphs with % of positive cells per cell line. (D-E) Confluency (%) of KPC-derived cell lines upon anti-CD73 *in vitro* treatment up to 72 hours. Concentrations are shown below graphs. (F) Cell colony area in mm<sup>2</sup> following 8-day treatment with increasing concentrations of anti-CD73 and isotype (100 µg/ml) for 2838c3 (left) and 6419c5 (right). (G) Viability (%) of human PDAC cell line PANC-1 following 3 days of treatment with oleclumab alone or in combination with the indicated drugs. (H-I) Viability (%) of human PDAC cell line PANC-1 following 3 (H) or 7 (I) days of treatment with the indicated drugs added after 2 or 24 hours of pre-treatment with oleclumab or control; NPT= No pre-treatment, PT=Pre-treatment. Data from G-I are normalised to the untreated control. (J-K) Confluency (%) of 2838c3 (left) and 6419c5 (right) upon 72-hour *in vitro* treatment with increasing AMP (J) and NECA (K) concentrations. Concentrations are shown below the graphs. All experiments have been repeated at least 3 times, with at least 3 technical replicates each time. All data are presented as mean +/- SEM. Statistical analysis was performed using one-way ANOVA with post-hoc test analysis for multiple comparisons (A-C, F-I) and mixed-effect models (D-E, J-K); p values are shown in the graphs when significant (p<0.05).

## Supplementary figure 3

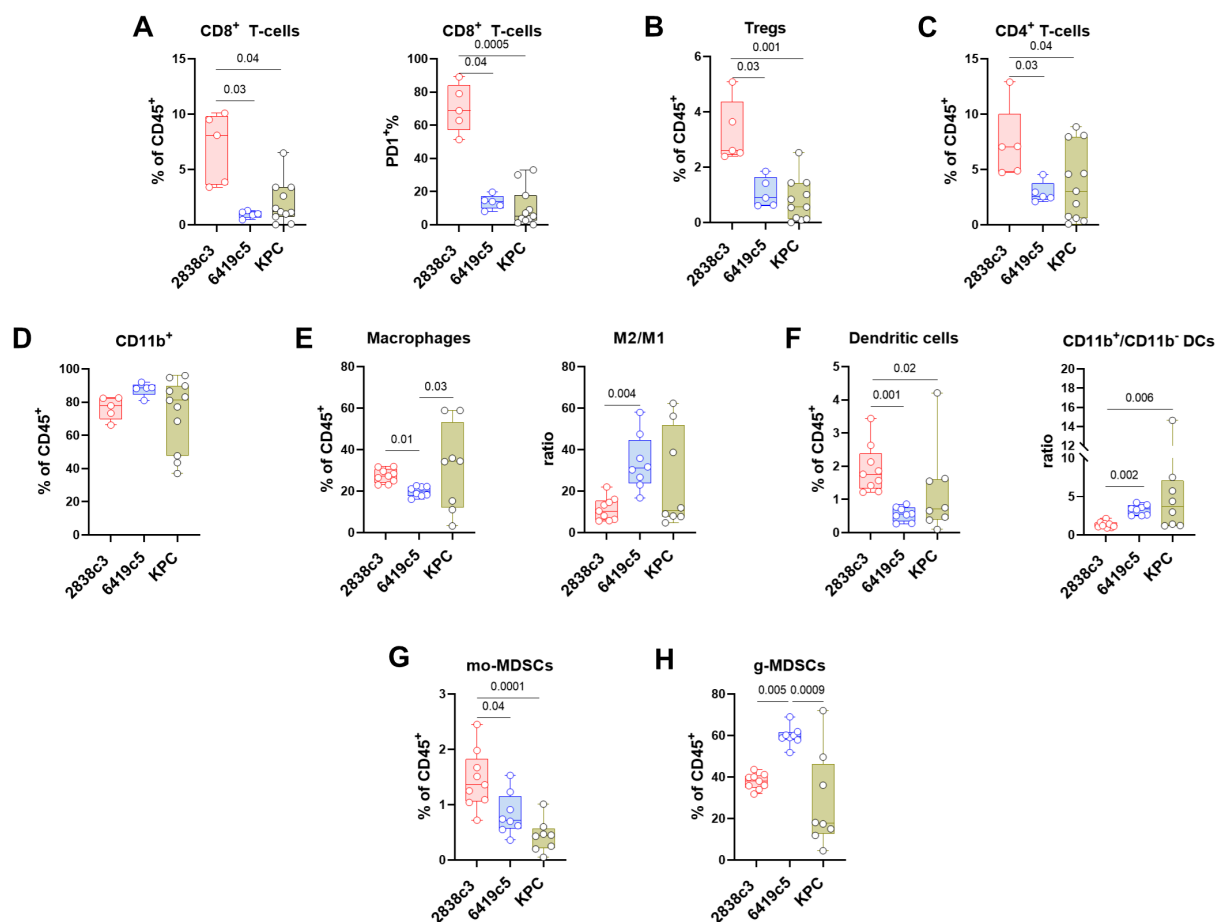

**Supplementary figure 3. KPC tumour immune infiltration has similarity to the IO resistant derived subcutaneous allografts.** (A-H) Flow analysis of tumour-infiltrating immune subpopulations for 2838c3 and 6419c5 s.c. allografts and KPC autochthonous tumours. The following are shown: (A) % of CD8 T-cells out of total CD45<sup>+</sup> cells (left) and % of PD1<sup>+</sup> cells out of total CD8 T-cells (right). Percentage out of total CD45<sup>+</sup> tumour-infiltrating cells for Tregs (B), CD4 T-cells (non Tregs, C), CD11b<sup>+</sup> cells (D), total macrophages (E), and M2/M1 macrophages ratio, right), dendritic cells (F, and CD11b<sup>+</sup>/CD11b<sup>-</sup> dendritic cells ratio, right), mo-MDSCs (G) and g-MDSCs (H). Box and whisker plots are presented. Statistical analysis was performed using one-way Anova with post-hoc test analysis for multiple comparisons; p values are shown in the graphs when significant (p<0.05).



**Supplementary figure 5**

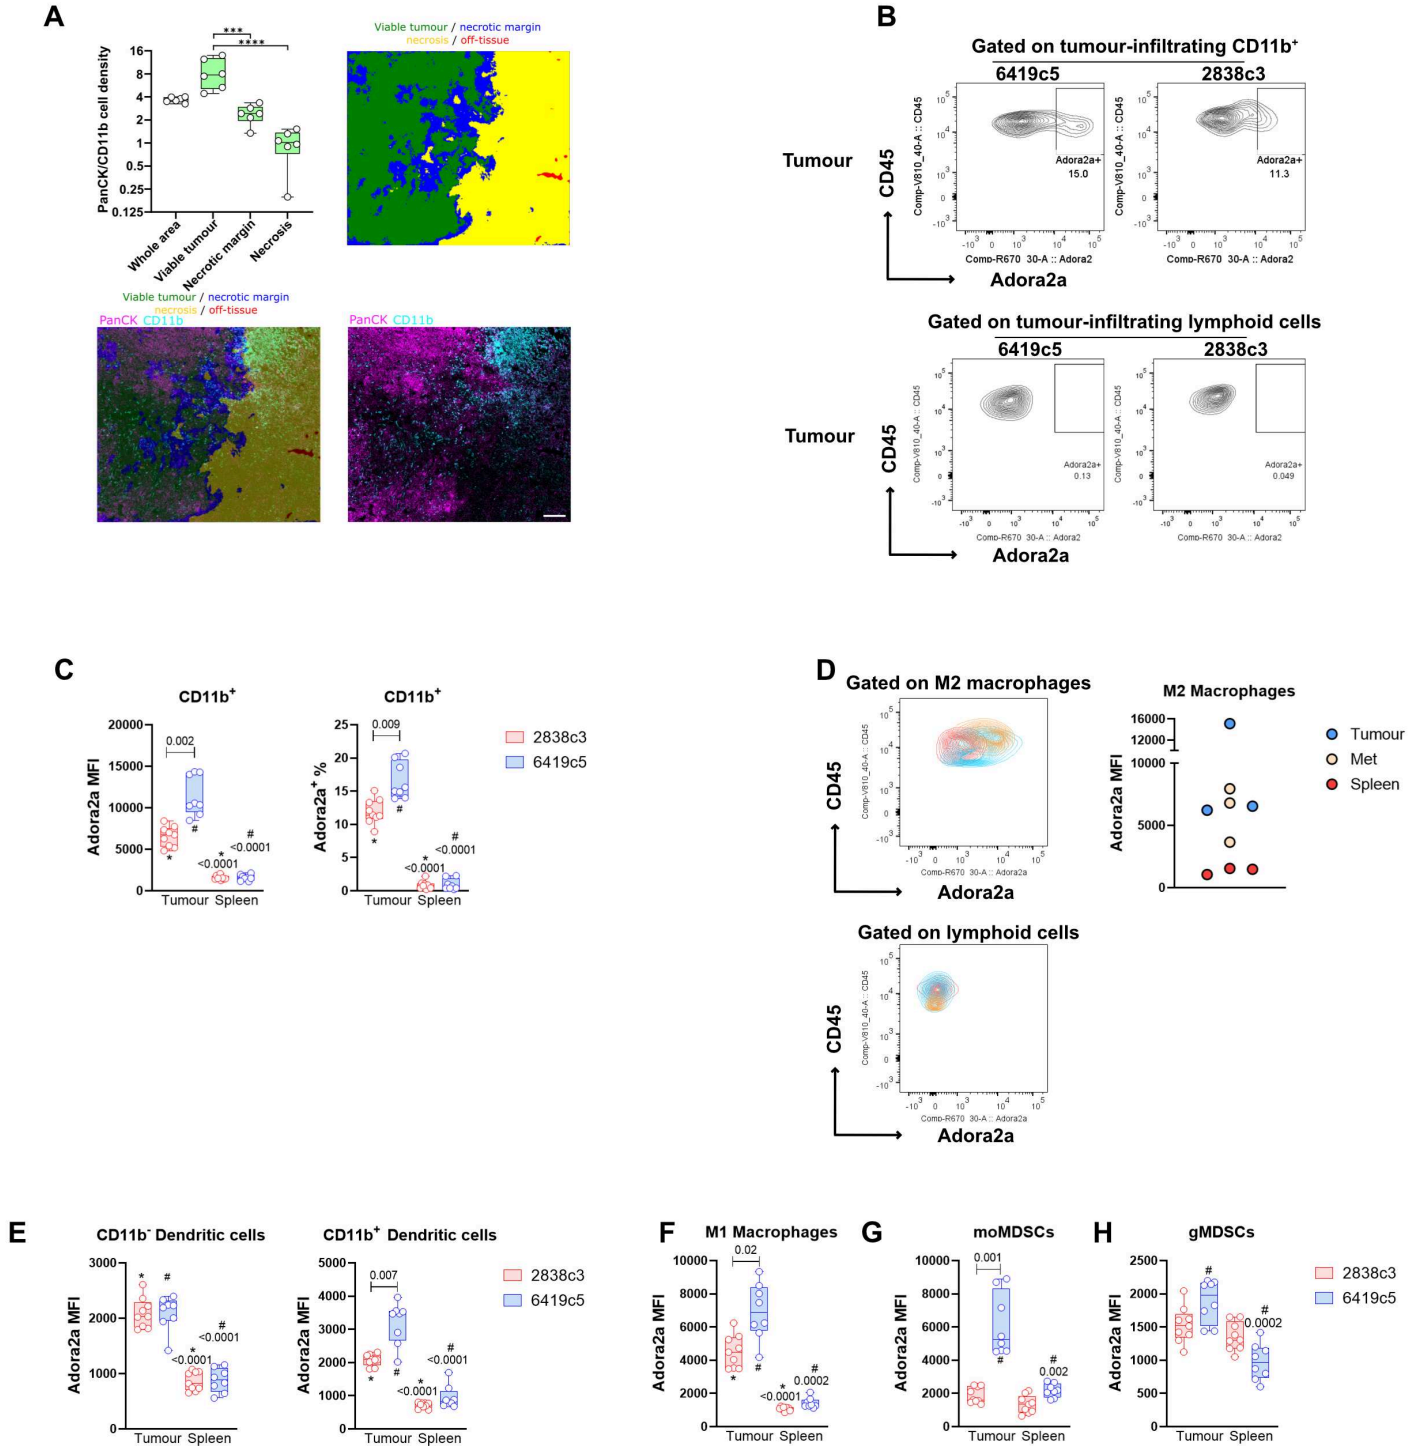

**Supplementary figure 5. Immune cells infiltrating PDAC models double express CD39 and CD73 and Adora2a receptor expression is increased in myeloid cells, in particular M2 macrophages.** (A) The plot (upper left) shows cell density of the ratio cancer cells (PanCK<sup>+</sup>, purple) / myeloid cells (CD11b<sup>+</sup>, blue) on a Log<sub>2</sub> scaled plot from Imaging Mass cytometry (IMC). The results of the comparison between the whole area analysed and the other tissue regions are not shown. N = 6. Asterisks \*\*\*\*, show adjusted p value of <0.0001. The IMC and tissue segmentation images (upper right and lowers) are from one representative 6419c5 allograft replicate at day 28 post-implantation. The tissue segmentation of the IMC image was performed by Random Forest Classification using all markers analysed. Scale bar on the IMC image is 200 μm. Segmentation shows viable tumour (green), necrosis (yellow), necrotic margin (blue) and off-tissue (red). (B) Plot of Adora2a expression on CD11b<sup>+</sup> cells (top) and lymphoid cells (bottom) infiltrating 6419c5 (left) and 2838c3 (right) allografts. (C) Adora2a expression as MFI in CD11b<sup>+</sup> cells (left) or percentage out of total Cd11b<sup>+</sup> infiltrating PDAC allografts (right). (D) Contour plots (left) overlapping Adora2a expression on M2 macrophages (top) and lymphoid cells (bottom) from tumour (blue), spleen (red) and metastatic liver lesion (orange) of a representative KPC mouse. Adora2a expression (MFI; right) of M2 macrophages in tumours (blue), spleens (red) and metastases (orange) of KPC mice. (E-H) Adora2a expression (MFI) in (E) CD11b<sup>-</sup> (left) and CD11b<sup>+</sup> (right) dendritic cells, M1 macrophages (F), mo-MDSCs (G) and gMDSCs (H). Box and whiskers are presented for all the graphs. Statistical analysis was performed using one-way Anova with post-hoc test analysis for multiple comparisons; p values are shown in the graphs when significant (p<0.05). Compared groups are connected by lines or have the same symbol # or \*.

## Supplementary figure 6

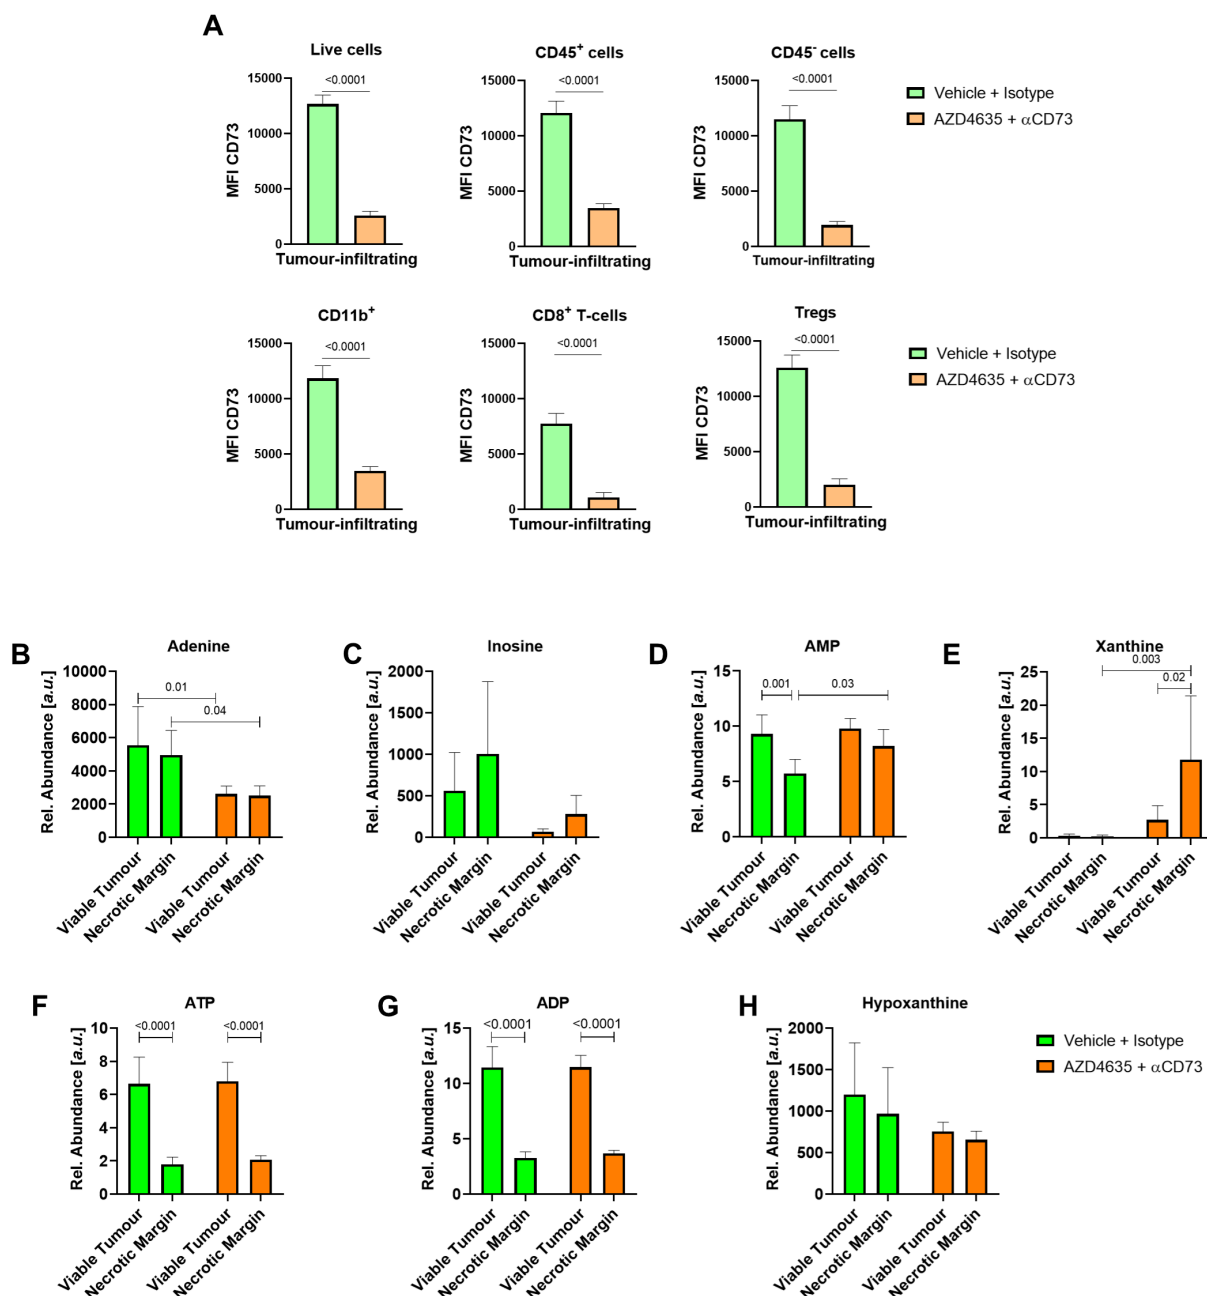

**Supplementary figure 6. Effect of adenosine inhibition on CD73 expression and tumour metabolites.** (A) Flow analysis of CD73 expression (MFI) following 14-day treatment with  $\alpha$ CD73 + AZD4635 (N=10) or vehicle + isotype (N=8) in total live cells (upper left), total CD45<sup>+</sup> cells (upper middle), total CD45<sup>-</sup> (upper right), CD11b<sup>+</sup> cells (lower left), CD8<sup>+</sup> T-cells (lower middle) and Tregs (lower right). (B-H) Relative abundance of Adenine (B), Inosine (C), AMP (D), Xanthine (E), ATP (F), ADP (G) and Hypoxanthine (H) in 6419c5 allografts treated with vehicle + isotype or  $\alpha$ CD73 + AZD4635 analysed through MSI. All data show mean  $\pm$  SEM. Statistical analysis was performed using two-tailed unpaired Student's t-test (A) and one-way ANOVA with post-hoc test analysis for multiple comparisons (B); p values are shown in the graphs when significant ( $p < 0.05$ ).



## Supplementary figure 7

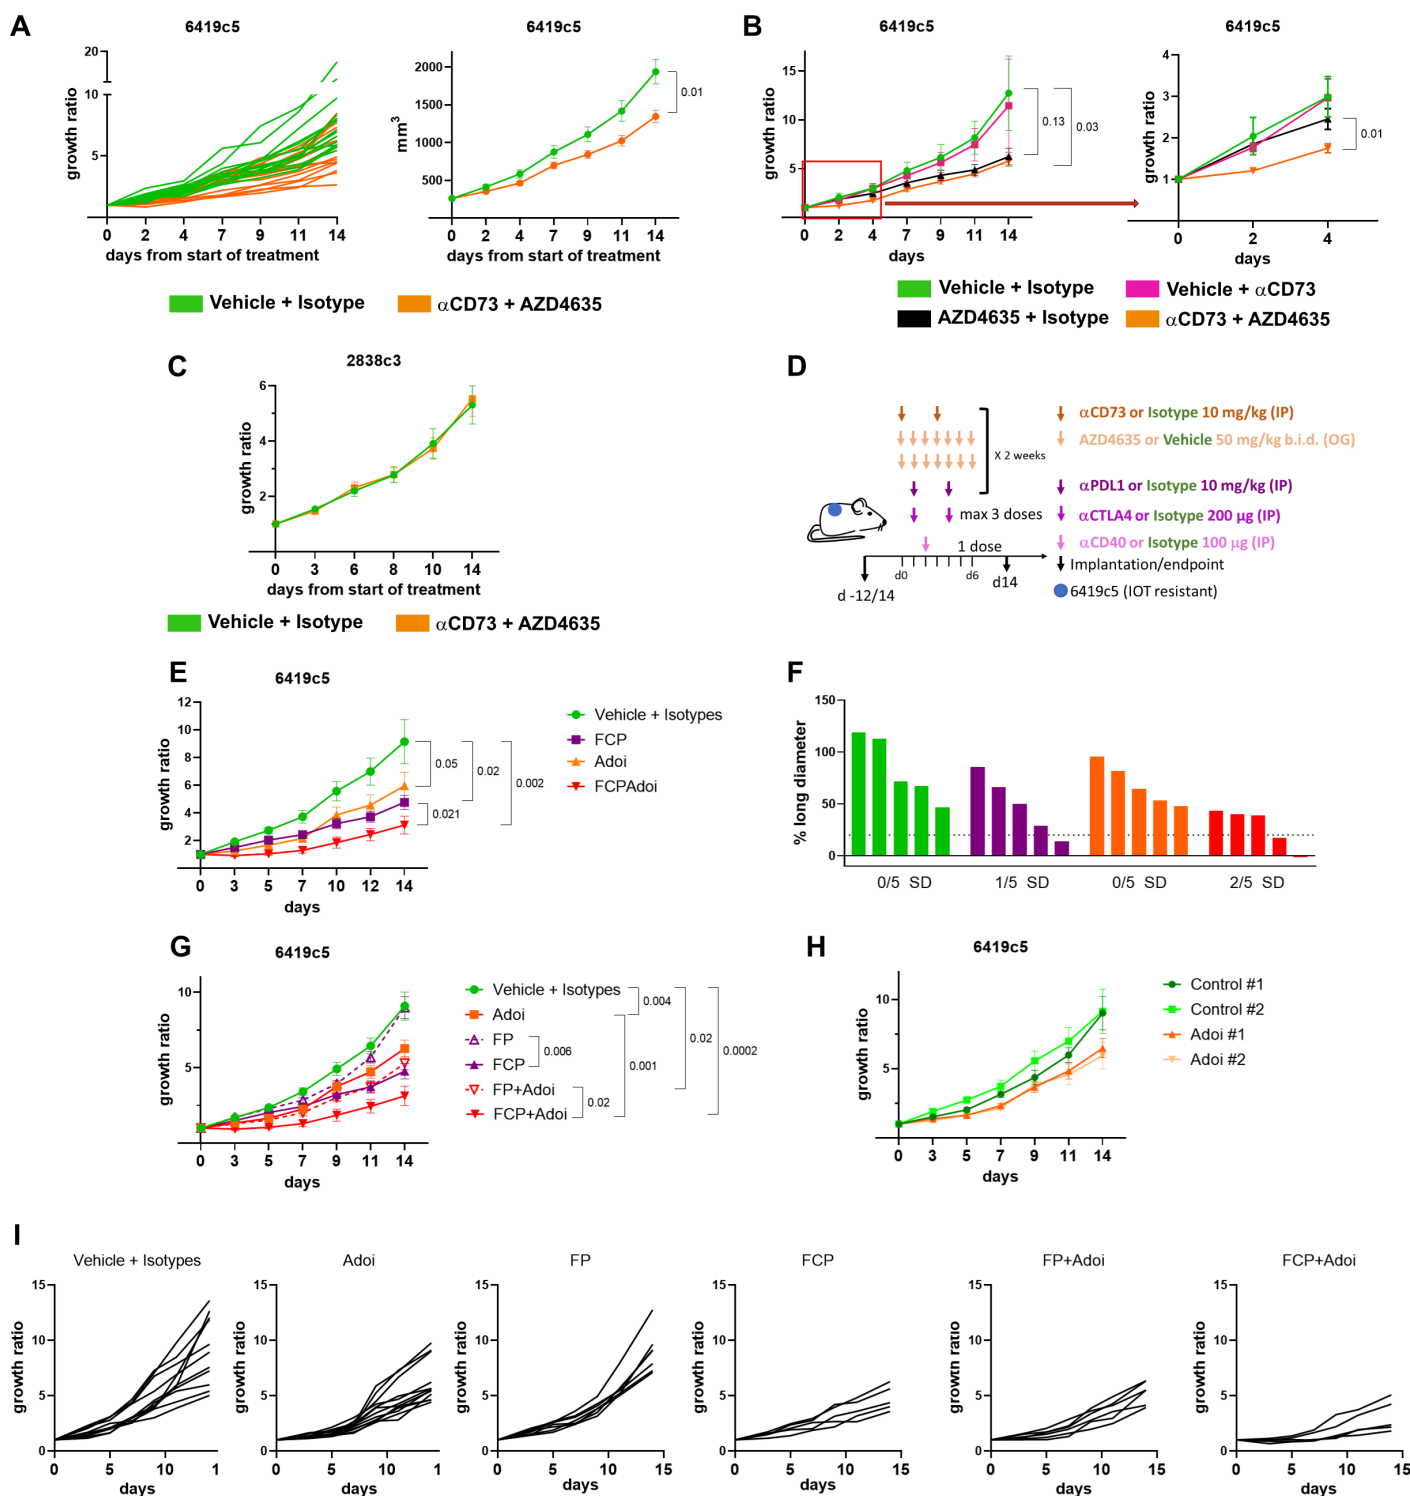

**Supplementary figure 7. Inhibiting the adenosine pathway reduces tumour growth in vivo, and improves tumour control when combined with cytotoxic or immunotherapy.** (A) Tumour growth ratio per single mouse (left) and tumour volume (in mm<sup>3</sup>) for mice treated with vehicle + isotype (control; N=15) or  $\alpha$ CD73 + AZD4635 (Adoi; N=16). (B) Tumour growth ratio of 6419c5 allografts treated with AZD4635 (N=5) and  $\alpha$ CD73 (N=5) or combination (N=6) of the two (and compared to vehicle + isotype, N=5), only the first 4 days of treatment (right graph). (C) Tumour growth ratio of 2838c3 allografts treated with Adoi or control for 14 days (7 mice per group). (D) Schedule of 6419c5 tumour allografts treated as following (N=5 mice per group): vehicle + isotypes, FCP (anti-CD40 agonist, anti-CTLA4, anti-PD-L1), anti-CD73 + AZD4635 (Adoi), FCPAdoi. (E-F) Tumour growth ratio (E) and percentage change in the long diameter length (F) following 14 days of treatment per group. Number of mice with stable disease (SD, <20% increase and <30% decrease) are shown at the bottom. (G) Tumour growth ratio of two merged experiments having similar control and Adoi arms growth in H. The following arms were analysed: Vehicle + Isotypes (N=11, control #1 N=6, control #2 N=5),  $\alpha$ CD73 + AZD4635 (Adoi N=12, Adoi#1 N=7, Adoi#2 N=5),  $\alpha$ CD40 agonist +  $\alpha$ PDL1 (FP, N=7),  $\alpha$ CD40 agonist +  $\alpha$ PDL1 +  $\alpha$ CTLA4 (FCP, N=5), FP + Adoi (N=6), FCP + Adoi (N=5). (I) Individual mouse tumour growth ratio for each treatment arm shown in G. Data show mean  $\pm$  SEM. Statistical analysis was performed using mixed-effects model (A-C, E, G-H); p values are shown in the graphs when significant (p<0.05).

## Supplementary figure 8

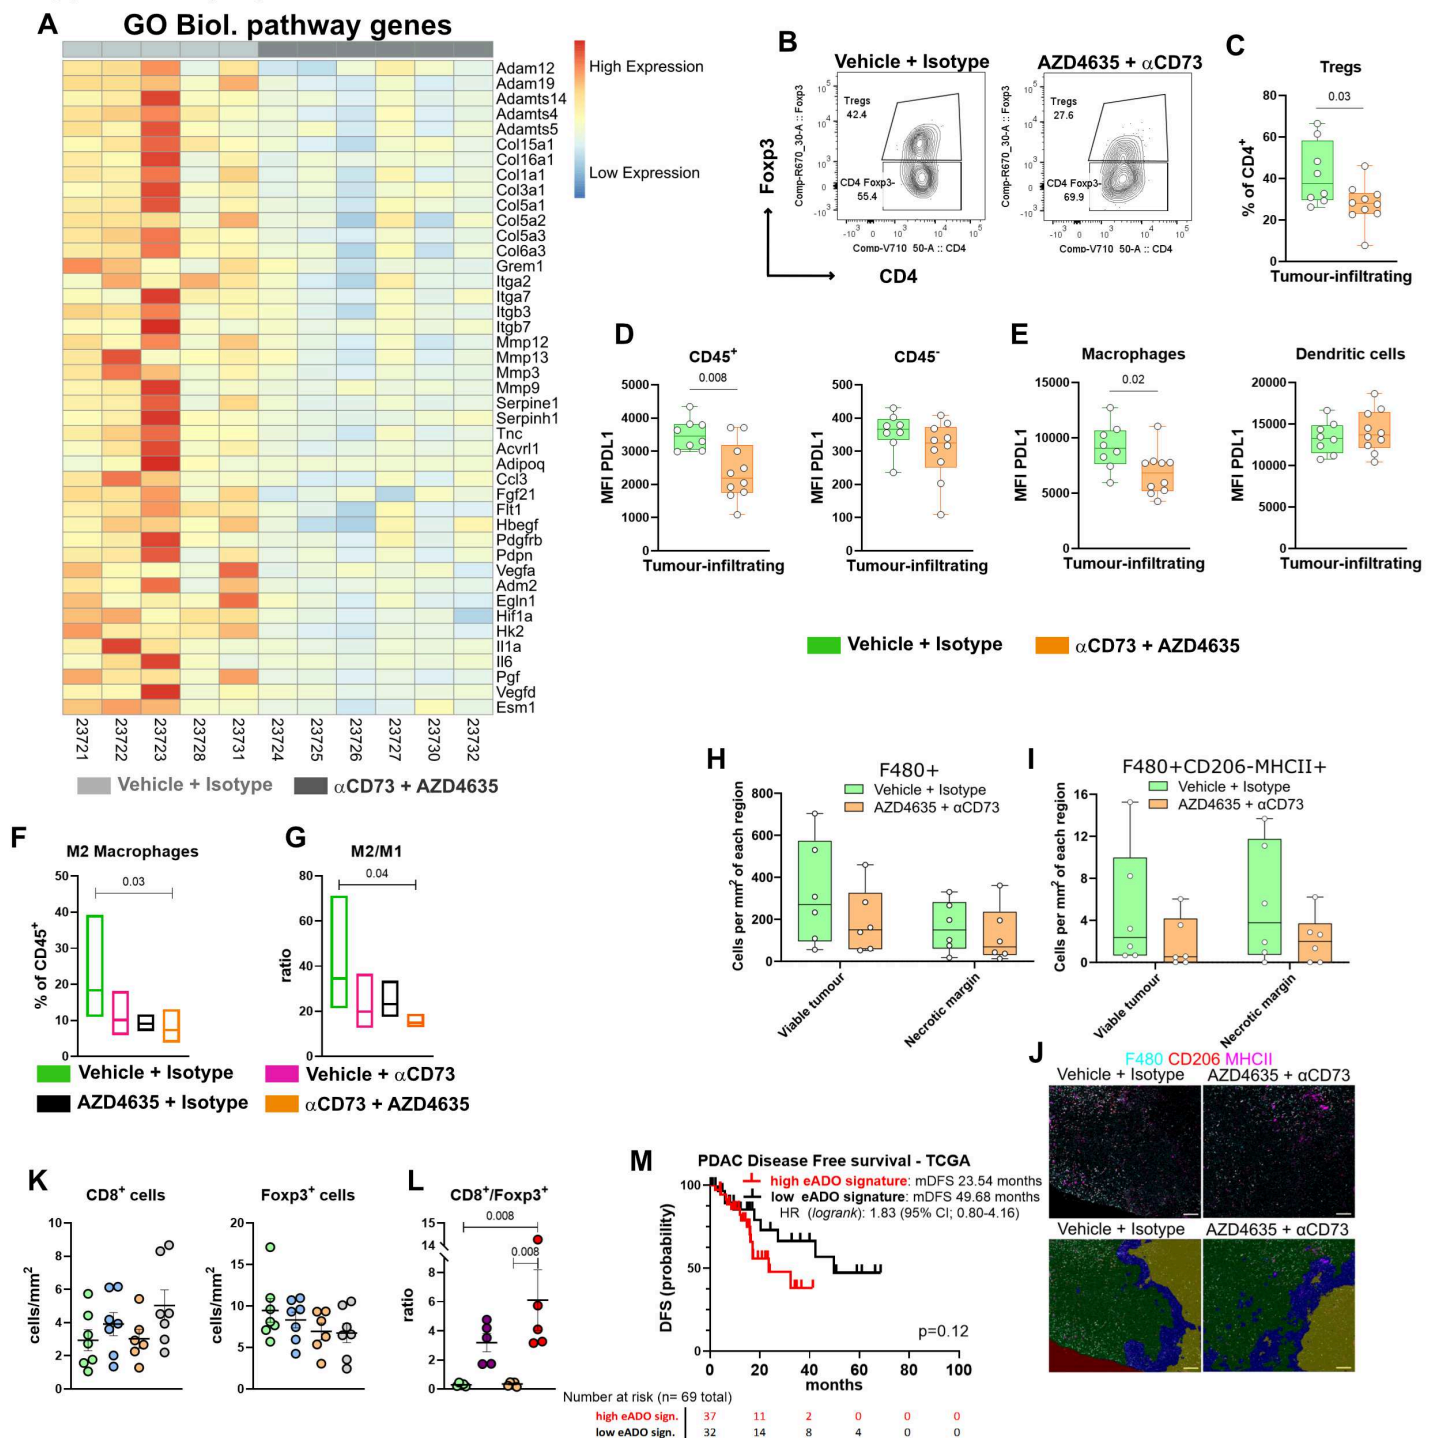

**Supplementary figure 8. TME modulation following adenosine inhibition and adenosine signature in human PDAC.** (A) Heatmap showing genes regulated during treatment (light grey for controls, dark grey for Adoi) which are part of the significantly different pathways according to GO Biological process. Some of the genes are also part of the Heatmap in fig. 5A. (B) Representative flow cytometry plot showing regulatory T-cells (Tregs) infiltrating 6419c5 allografts following 14 days of treatment with vehicle + isotype (left panel) or anti-CD73 + AZD4635 (right panel). (C) Infiltration of allografts by Tregs (number of cells/100mg of tumour; 8 and 10 mice per group analysed). (D-E) Flow analysis of PDL1 expression in CD45<sup>+</sup> cells (D, left), CD45<sup>-</sup> cells (right) and macrophages (E, left), dendritic cells (right) following 14-day treatment of vehicle + isotype (Control) or anti-CD73 +AZD4635 (Adoi). (F-G) Flow analysis on the effect on the TME of the treatments shown in suppl. fig. 6B, representing M2 macrophages tumour infiltration (F) and M2/M1 ratio (G). (H-J) IMC analysis for the spatial distribution (viable tumour and necrotic margin) of 6419c5 allografts in C57Bl/6 mice treated or not with Control or Adoi for 14 days. F4/80<sup>+</sup> cell (H) and M1 macrophages (F4/80<sup>+</sup> CD206<sup>-</sup> MHCII<sup>+</sup>, I-J) are shown. (K) 6419c5 tumour-infiltrating CD8<sup>+</sup> (left) and Foxp3<sup>+</sup> (right) following ATRi/gem and Adoi experiment in fig.6G (L) Immunohistochemistry analysis following IOT and Adoi experiment in suppl. fig. 6C showing the ratio CD8<sup>+</sup>/Foxp3<sup>+</sup> cells. (M) Human PDAC disease free survival based on 52-gene adenosine signature used for analysis of TCGA dataset (N=69 patients). Statistical analysis was performed using Mann-Whitney test (C-E), one-way Anova (F-G) with post-hoc test analysis for multiple comparisons (H-I,K-L), and log-rank Mantel-Cox test (L); p values are shown in the graphs when significant ( $p < 0.05$ ).
